# Supplementary material
Source: Research Square preprint supplement (doi:10.21203/rs.3.rs-9411663/v1)
Supplement: Supplementary file 1 [file 36dfe79eefd297c280e5f3cc.docx]

Appendix A

**Table A1：Basic Regression Result**

| Variables | Wife's Labor force participation | | | |
| --- | --- | --- | --- | --- |
| （1） | （2） | （3） | （4） |
| Husband's Commuting Time | -0.023*** | -0.022** | -0.023*** | -0.023*** |
| (0.009) | (0.009) | (0.009) | (0.009) |
| Wife's Age |  | -0.009 | -0.019 | -0.020 |
|  | (0.022) | (0.022) | (0.022) |
| Wife's Years of Education |  | 0.013** | 0.014** | 0.014** |
|  | (0.006) | (0.006) | (0.006) |
| Wife's Health Status |  | 0.003 | 0.004 | 0.004 |
|  | (0.006) | (0.006) | (0.006) |
| Wife's Household Registration Type |  | -0.041 | -0.040 | -0.040 |
|  | (0.028) | (0.028) | (0.029) |
| Wife's Pension Insurance |  | 0.046*** | 0.049*** | 0.049*** |
|  | (0.015) | (0.015) | (0.015) |
| Wife's Social Status |  | 0.030*** | 0.029*** | 0.029*** |
|  | (0.007) | (0.007) | (0.007) |
| Husband's Age |  | -0.005 | -0.007 | -0.007 |
|  | (0.007) | (0.007) | (0.007) |
| Husband's Income |  | 0.007 | -0.013 | -0.013 |
|  | (0.006) | (0.009) | (0.009) |
| Husband's Years of Education |  | -0.001 | -0.002 | -0.002 |
|  | (0.006) | (0.006) | (0.006) |
| Husband's Health Status |  | -0.001 | -0.001 | -0.001 |
|  | (0.006) | (0.006) | (0.006) |
| Husband's Household Registration Type |  | 0.058* | 0.061* | 0.061* |
|  | (0.033) | (0.033) | (0.033) |
| Husband's Pension Insurance |  | -0.040** | -0.039** | -0.038** |
|  | (0.015) | (0.015) | (0.015) |
| Husband's Social Status |  | -0.007 | -0.005 | -0.005 |
|  | (0.007) | (0.007) | (0.007) |
| Urban-Rural Status of Household |  |  | 0.005 | 0.001 |
|  |  | (0.028) | (0.028) |
| Number of Children |  |  | 0.012 | 0.012 |
|  |  | (0.021) | (0.021) |
| Household Size |  |  | -0.035*** | -0.034*** |
|  |  | (0.007) | (0.007) |
| Private Car Ownership |  |  | -0.011 | -0.010 |
|  |  | (0.015) | (0.015) |

**Table A1：Basic regression result（Continued）**

| Variables | Wife's Labor force participation | | | |
| --- | --- | --- | --- | --- |
| （1） | （2） | （3） | （4） |
| Total Household Income |  |  | 0.042*** | 0.041*** |
|  |  | (0.010) | (0.010) |
| Economic Development Level |  |  |  | 0.186** |
|  |  |  | (0.089) |
| Housing Price |  |  |  | -0.066 |
|  |  |  | (0.053) |
| Number of Public Buses |  |  |  | -0.000 |
|  |  |  | (0.000) |
| Individual Fixed Effects | Yes | Yes | Yes | Yes |
| Time Fixed Effects | Yes | Yes | Yes | Yes |
| Constant | 0.882*** | 1.148 | 1.504 | 0.092 |
| (0.024) | (0.955) | (0.962) | (1.246) |
| Adjusted R-squared | 0.3986 | 0.4045 | 0.4114 | 0.4117 |
| N | 6313 | 6313 | 6313 | 6313 |

Note: (1) *, **, and*** denote significance at the 10%, 5%, and 1% levels, respectively. (2) Robust standard errors clustered at the individual level are reported in parentheses.

Appendix B

**Table B1：Instrumental Variables Test**

| Variables | First-Stage Regression | Second-Stage Regression |
| --- | --- | --- |
| Husband's Commuting Time | Wife's Labor force participation |
| (1) | （2） |
| Workplace Relocation | 0.082*** |  |
| (0.023) |  |
| Husband's Commuting Time |  | -0.325** |
|  | (0.158) |
| Wife's Age | -0.081* | -0.046 |
| (0.045) | (0.029) |
| Wife's Years of Education | -0.006 | 0.012* |
| (0.012) | (0.007) |
| Wife's Health Status | 0.032** | 0.013 |
| (0.013) | (0.009) |
| Wife's Household Registration Type | 0.025 | -0.032 |
| (0.047) | (0.032) |
| Wife's Pension Insurance | -0.054* | 0.034* |
| (0.028) | (0.019) |
| Wife's Social Status | -0.001 | 0.029*** |
| (0.013) | (0.008) |
| Husband's Age | 0.003 | -0.005 |
| (0.019) | (0.008) |
| Husband's Income | 0.016 | -0.008 |
| (0.019) | (0.011) |
| Husband's Years of Education | 0.027* | 0.006 |
| (0.015) | (0.009) |
| Husband's Health Status | -0.003 | -0.003 |
| (0.013) | (0.008) |
| Husband's Household Registration Type | -0.046 | 0.046 |
| (0.065) | (0.039) |
| Husband's Pension Insurance | 0.048 | -0.024 |
| (0.031) | (0.019) |
| Husband's Social Status | -0.009 | -0.008 |
| (0.015) | (0.008) |
| Urban-Rural Status of Household | -0.003 | 0.001 |
| (0.063) | (0.033) |
| Number of Children | -0.011 | 0.009 |
| (0.038) | (0.023) |

**Table B1：Instrumental Variables Test（Continued）**

| Variables | First-Stage Regression | Second-Stage Regression |
| --- | --- | --- |
| Husband's Commuting Time | Wife's Labor force participation |
| (1) | （2） |
| Household Size | -0.005 | -0.036*** |
| (0.012) | (0.008) |
| Private Car Ownership | -0.005 | -0.011 |
| (0.029) | (0.018) |
| Total Household Income | 0.047* | 0.055*** |
| (0.025) | (0.015) |
| Economic Development Level | -0.180 | 0.129 |
| (0.190) | (0.113) |
| Housing Price | -0.103 | -0.098 |
| (0.117) | (0.067) |
| Number of Public Buses | 0.000 | -0.000 |
| (0.000) | (0.000) |
| Individual Fixed Effects | Yes | Yes |
| Time Fixed Effects | Yes | Yes |
| Constant | 7.718*** | 0.476* |
| Adjusted R-squared | (2.638) | (0.276) |
| N | 0.5056 | -0.3355 |
| F-statistic | 6313 | 6313 |
| Individual Fixed Effects | 12.66 |  |
| Kleibergen-Paap rk LM | P=0.0004 |  |

Note: (1) *, **, and*** denote significance at the 10%, 5%, and 1% levels, respectively. (2) Robust standard errors clustered at the individual level are reported in parentheses.
